# Supplementary material for: AAV13 Enables Precise Targeting of Local Neural Populations
Source: MDPI journal article supplement (doi:10.3390/ijms232112806), 2022-10-24
Supplement: s1 [file s1]

# AAV13 Enables Precise Targeting of Local Neural Populations

Zengpeng Han <sup>1,2,3,†</sup>, Nengsong Luo <sup>4,†</sup>, Yang Wu <sup>1,2</sup>, Jiaxin Kou <sup>5</sup>, Wenyu Ma <sup>1,2</sup>, Xin Yang <sup>1</sup>, Yuxiang Cai <sup>4</sup>, Lin Ma <sup>5</sup>, Lu Han <sup>6</sup>, Xiujie Wang <sup>6</sup>, Hualing Qin <sup>6</sup>, Qing Shi <sup>3</sup>, Jie Wang <sup>1,2</sup>, Chaohui Ye <sup>1,2</sup>, Kunzhang Lin <sup>3,\*</sup> and Fuqiang Xu <sup>1,2,3,4,7,\*</sup>

\* Correspondence: kz.lin@siat.ac.cn (K.L.); fq.xu@siat.ac.cn (F.X.); Tel.: +86-150-7244-8709 (K.L.); +86-139-9550-5336 (F.X.)

† These authors contributed equally to this work.

## Supplementary Information

(Contains Supplementary Table S1 and Figure S1 with Legends)

**Supplementary Table S1. rAAV viral vectors titers**

| No. | AAV Vector                          | Titer (VG/mL)      |
|-----|-------------------------------------|--------------------|
| 1   | rAAV13-CMV-EGFP-WPRE-pA             | $4 \times 10^{12}$ |
| 2   | rAAV13-EF1 $\alpha$ -EGFP-WPRE-pA   | $5 \times 10^{12}$ |
| 3   | rAAV2-EF1 $\alpha$ -mCherry-WPRE-pA | $4 \times 10^{12}$ |
| 4   | rAAV13-hSyn-Cre-WPRE-pA             | $4 \times 10^{13}$ |
| 5   | rAAV13-CAG-DIO-EGFP-WPRE-pA         | $2 \times 10^{13}$ |
| 6   | rAAV13-CaMKII-Cre-WPRE-pA           | $3 \times 10^{13}$ |
| 7   | rAAV9-CAG-DIO-EGFP-WPRE-pA          | $8 \times 10^{12}$ |
| 8   | rAAV9-hSyn-DIO-GCaMP6m-WPRE-pA      | $1 \times 10^{13}$ |

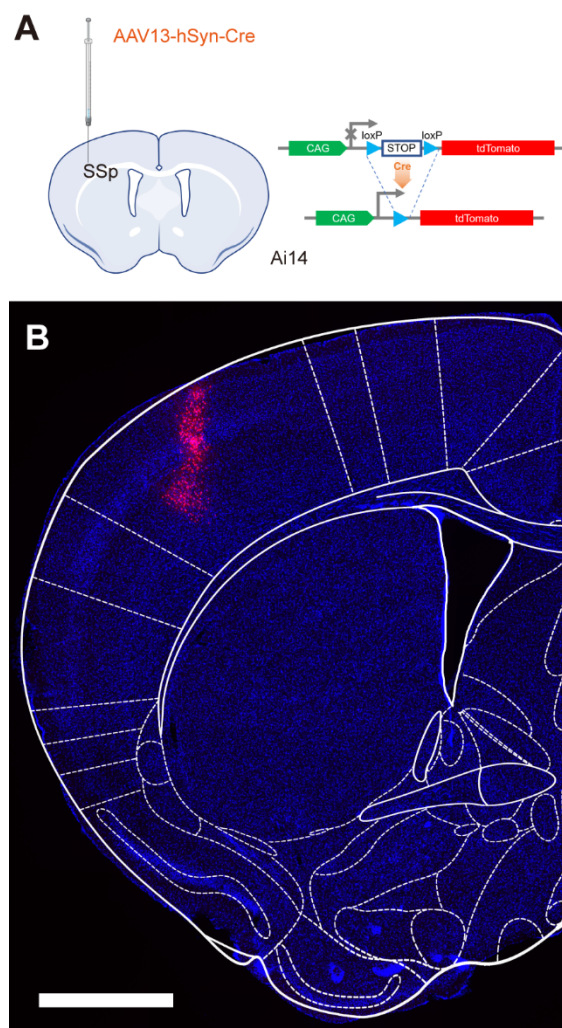

**Supplementary Figure S1.** AAV13 does not exhibit retrograde or transsynaptic propagation. **(A)** Schematic diagram of virus injection. AAV13-hSyn-Cre ( $3 \times 10^9$  VG) was injected into SSp region of Ai14 transgenic mice, in which the expression of tdTomato fluorescent reporter is Cre-dependent. **(B)** TdTomato expression was observed only at the injection site. Scale bar = 1 mm.
